# Supplementary figures and images for: Influence of the phonon-bottleneck effect and low-energy vibrational modes on the slow spin-phonon relaxation in Kramers-ions-based Cu(ii) and Co(ii) complexes with 4-amino-3,5-bis-(pyridin-2-yl)-1,2,4-triazole and dicyanamide
Source: Royal Society of Chemistry journal article supplement (doi:10.1039/d4dt00219a), 2024-01-01

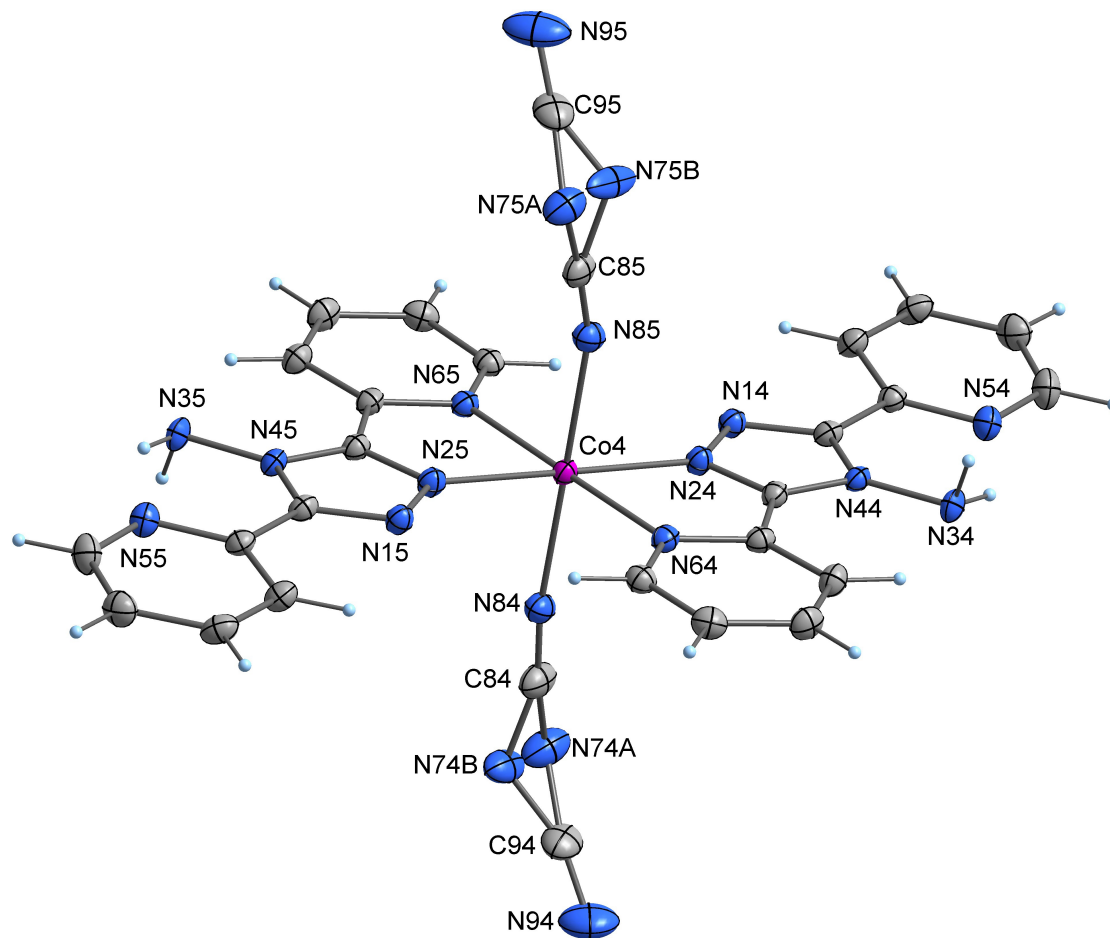

Supplement: d4dt00219a16.pdf [file d4dt00219a16.pdf]

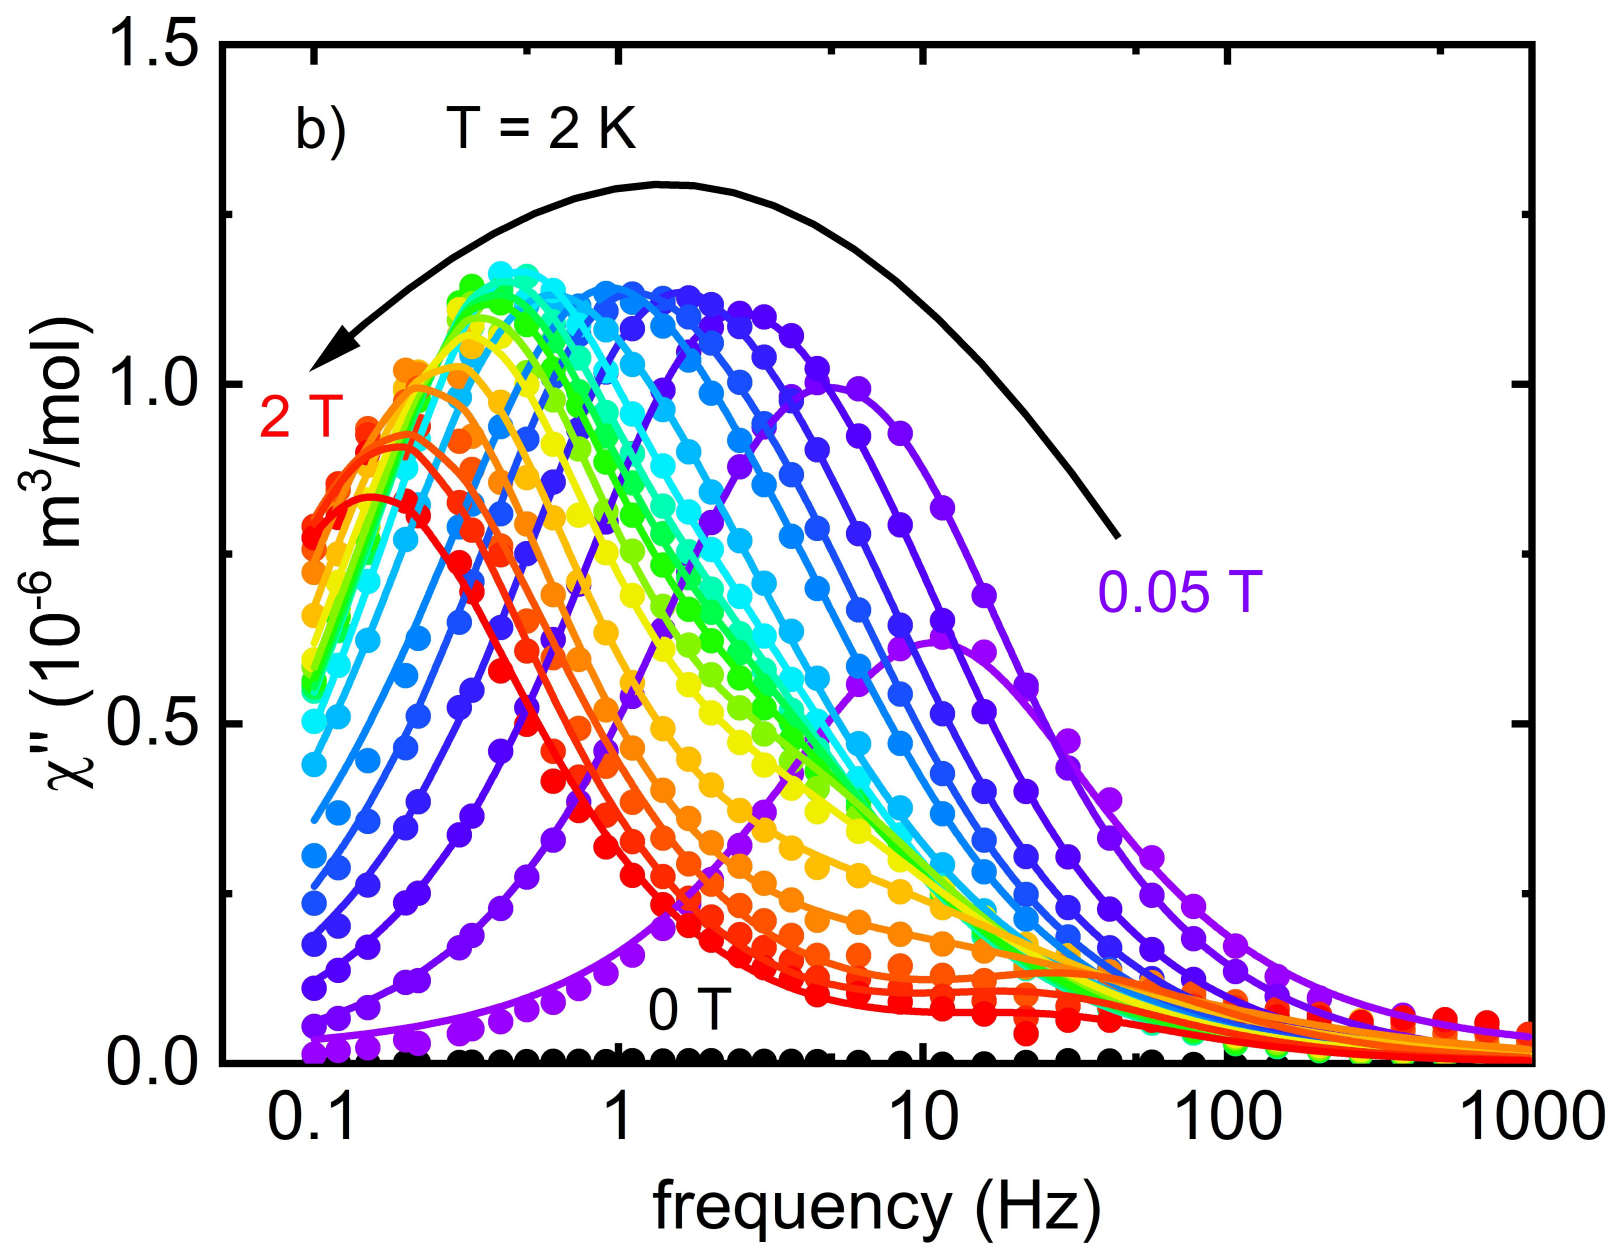

Supplement: d4dt00219a23.pdf [file d4dt00219a23.pdf]

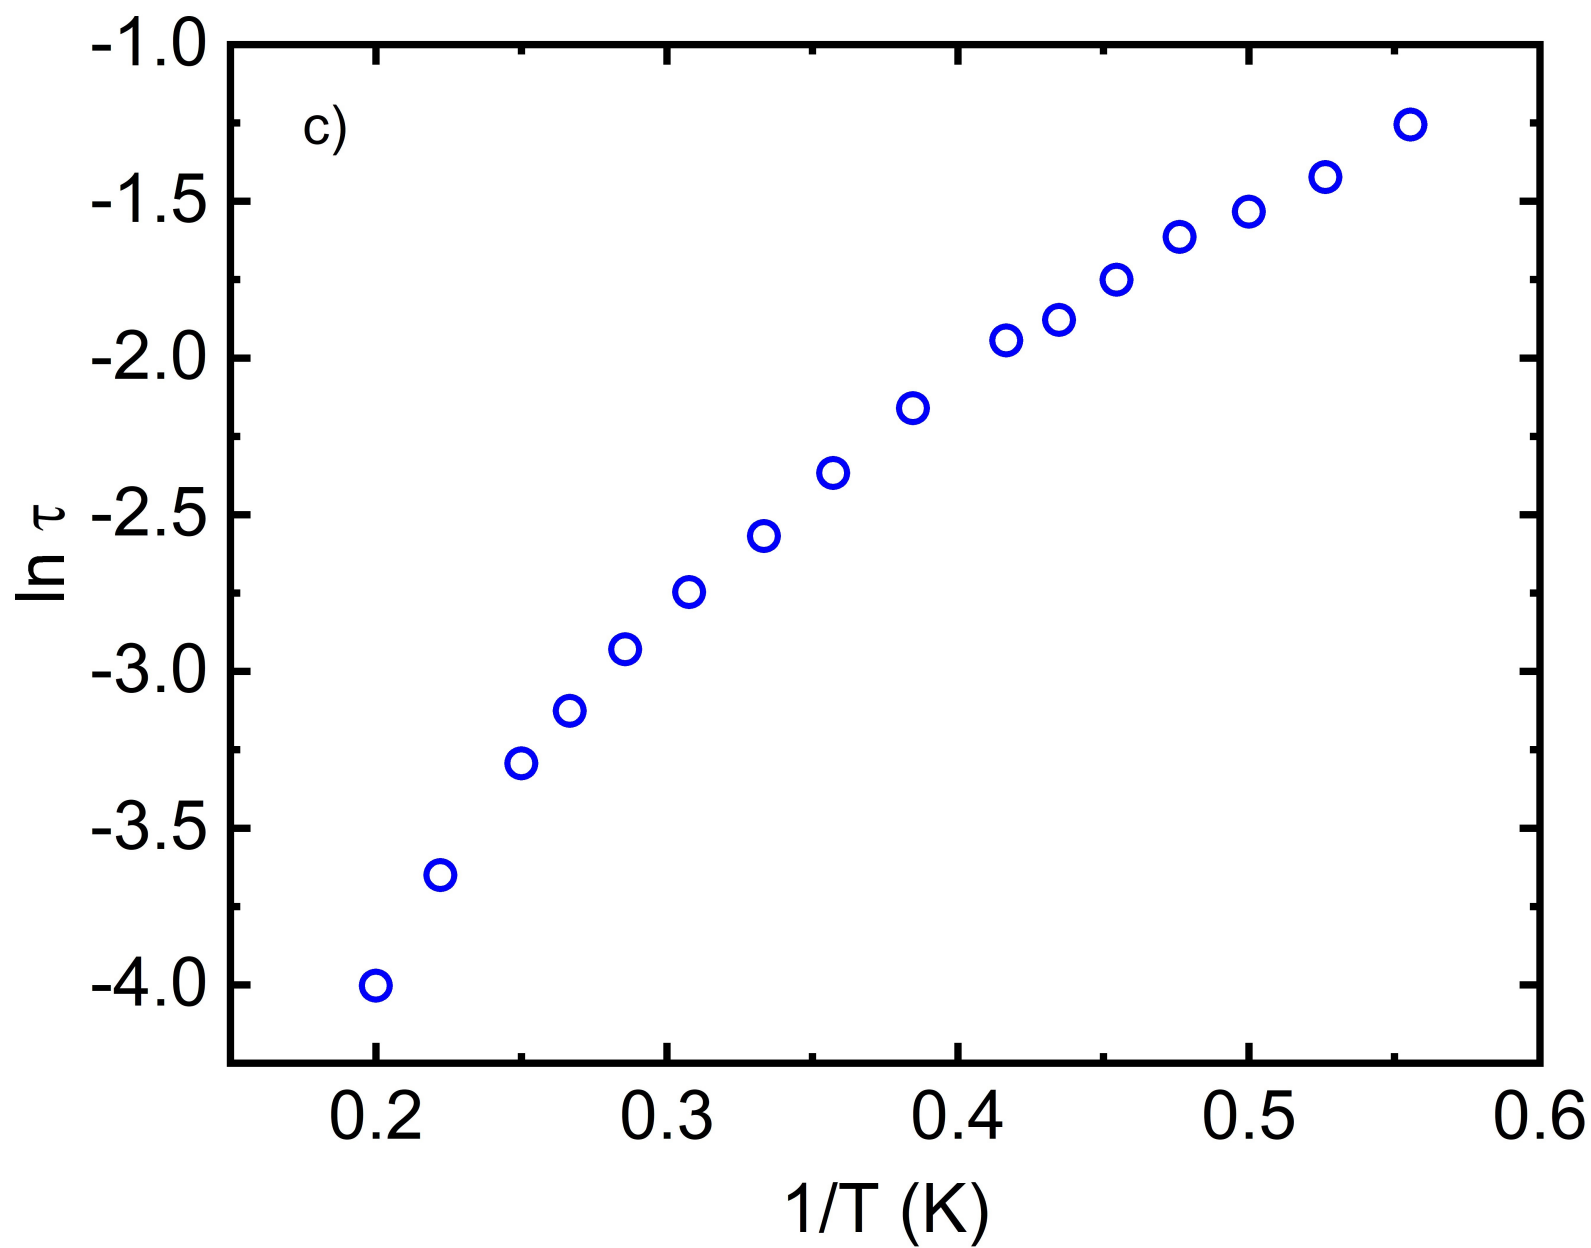

Supplement: d4dt00219a26.pdf [file d4dt00219a26.pdf]

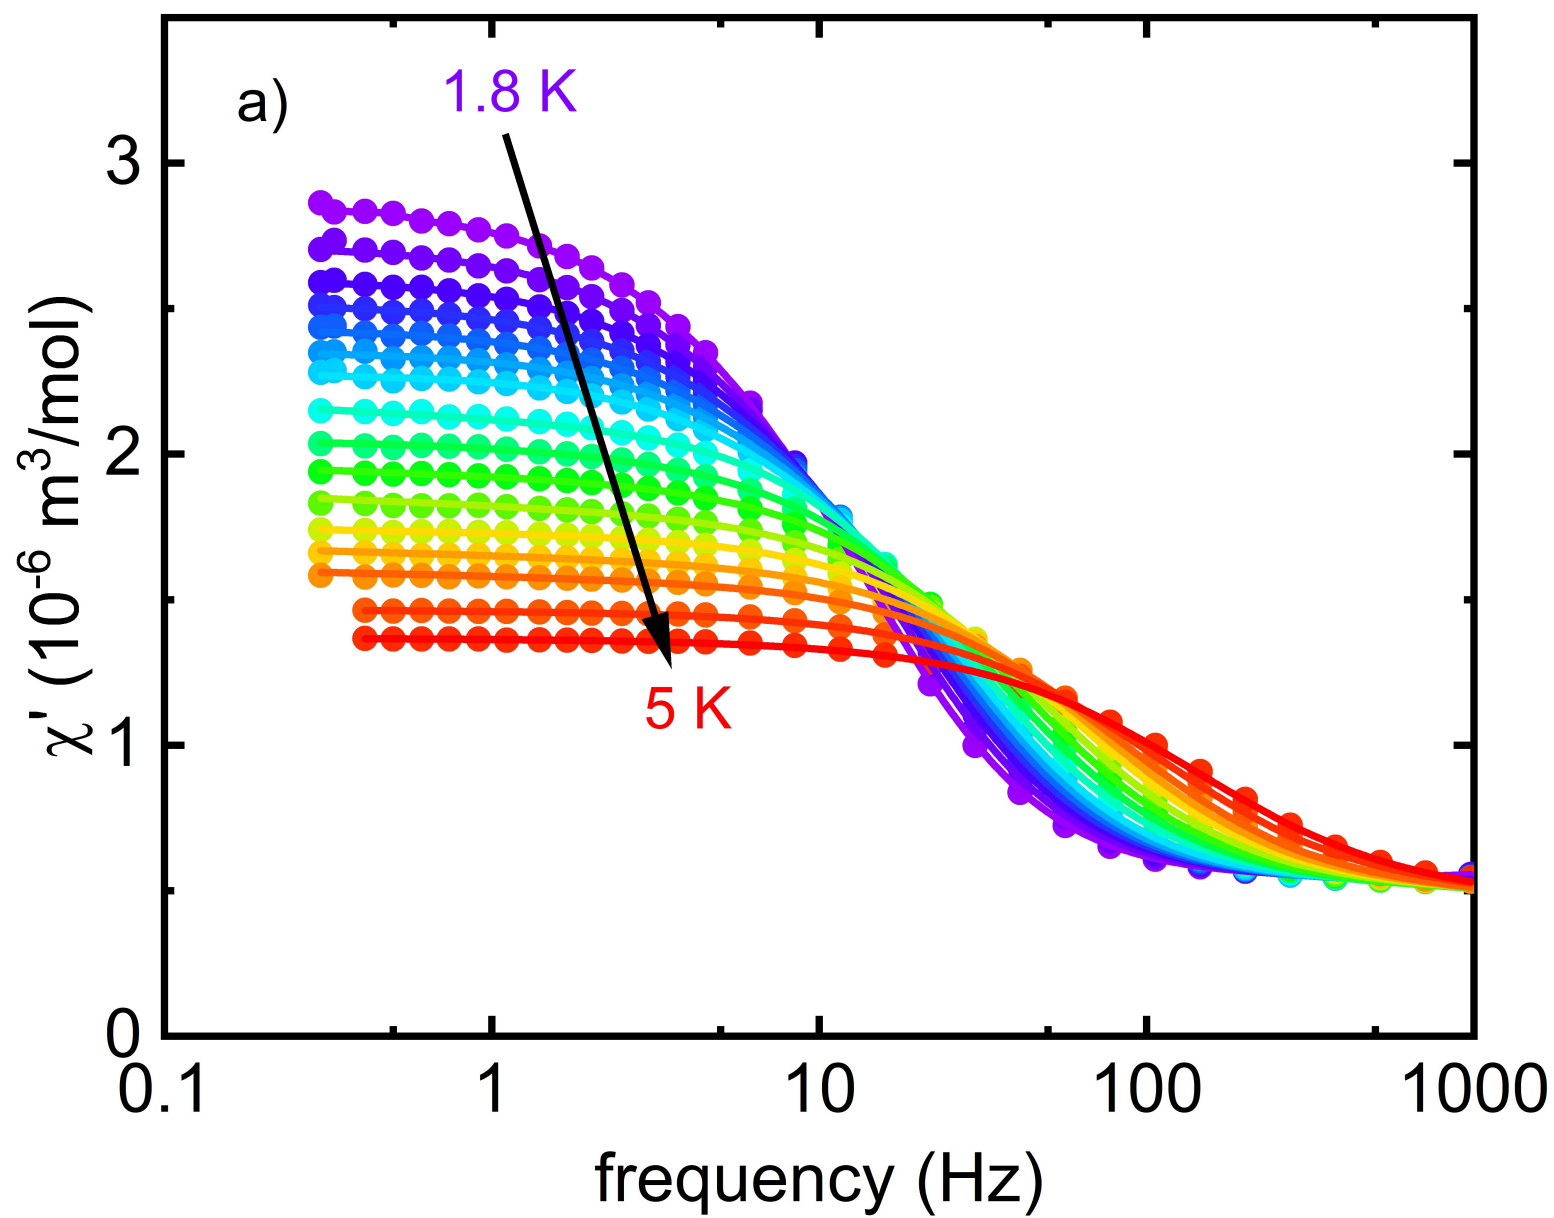

Supplement: d4dt00219a29.pdf [file d4dt00219a29.pdf]

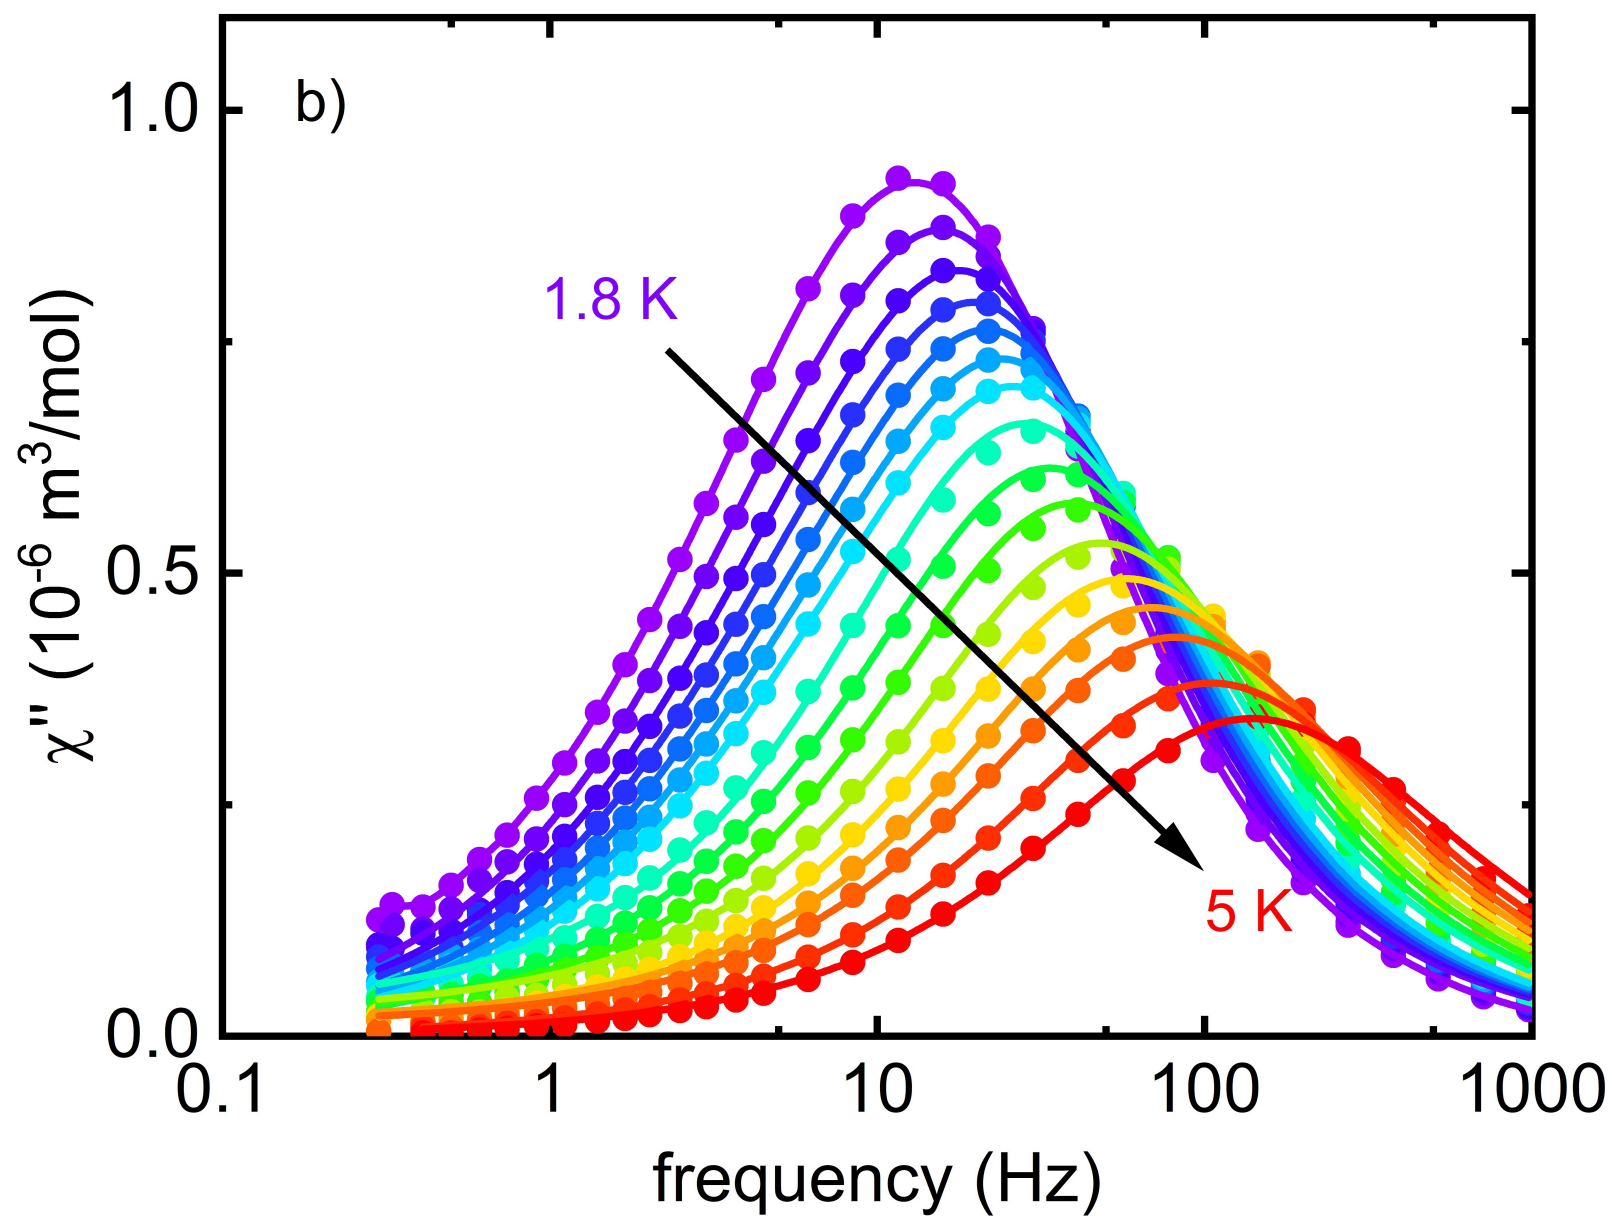

Supplement: d4dt00219a30.pdf [file d4dt00219a30.pdf]

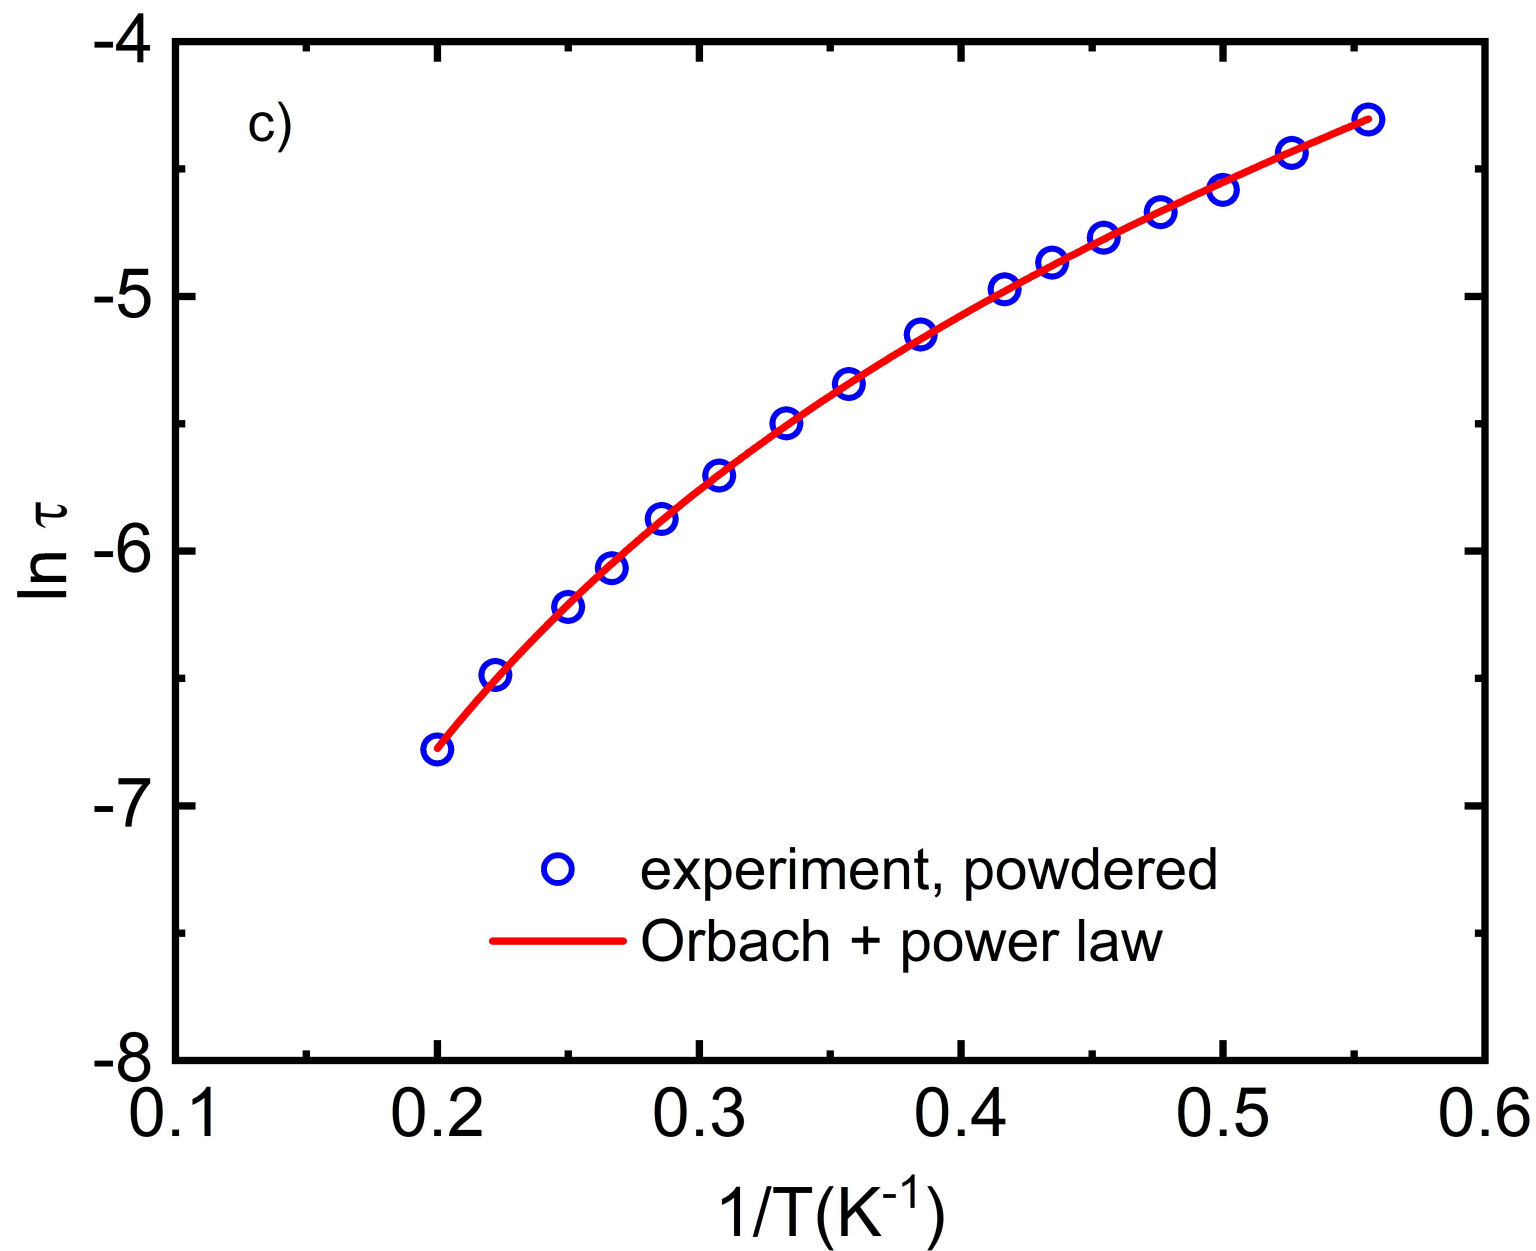

Supplement: d4dt00219a31.pdf [file d4dt00219a31.pdf]

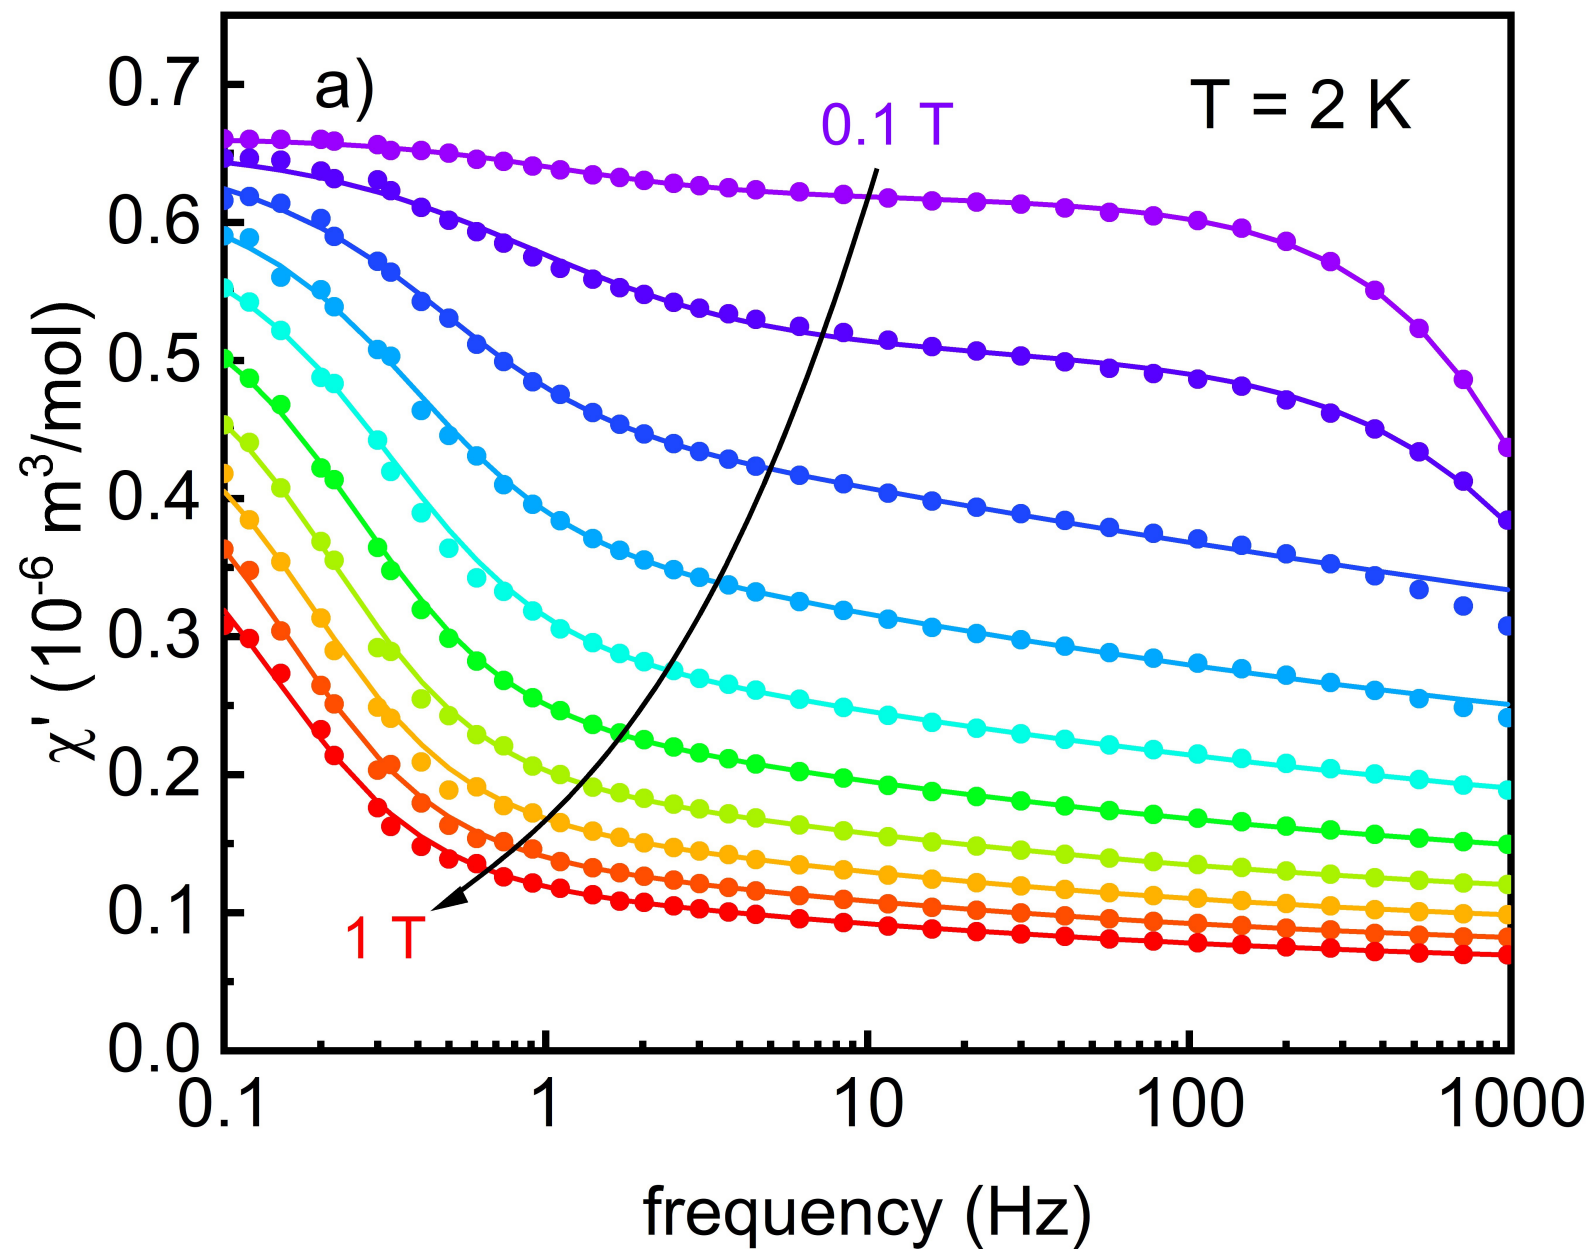

Supplement: d4dt00219a9.pdf [file d4dt00219a9.pdf]
